# Supplementary material for: Maternal sucralose exposure induces Paneth cell defects and exacerbates gut dysbiosis of progeny mice
Source: Royal Society of Chemistry journal article supplement (doi:10.1039/d1fo02921e), 2021-01-01
Supplement: d1fo02921e1.pdf [file d1fo02921e1.pdf]

**Table 1 The Oligonucleotide primers for target genes**

| <b>Primers</b>                 | <b>Sequence</b>                            |
|--------------------------------|--------------------------------------------|
| <b>GAPDH</b>                   | Forward:5'- GGAGAAACCTGCCAAGTATG-3'        |
|                                | Reverse:5'- TGGGAGTTGCTGTTGAAGTC-3'        |
| <b>Lysozyme</b>                | Forward:5'- AGATCCCCAAGGCATTCTGA-3'        |
|                                | Reverse:5'-TCCTACAGTGAGAAAGAGACMGAAT-3'    |
| <b>Cryptdin</b>                | Forward:5'- CAGCCGGAGAAGAGGACCAG -3'       |
|                                | Reverse:5'- TAGCATACCAGATCTCTCAACGATTC -3' |
| <b>Cryptdin1</b>               | Forward:5'- GCTGCAAAGGAAGAGAACGC -3'       |
|                                | Reverse:5'- TGGTCTCCATGTTTCAGCGAC -3'      |
| <b>Cryptdin2</b>               | Forward:5'- AGGAGGCTGCAATAGAGGAGA -3'      |
|                                | Reverse:5'- CAGGCCCCAGCATCAGTAG -3'        |
| <b>Cryptdin5</b>               | Forward:5'- AGAACGCGTTTTTGGGACCT -3'       |
|                                | Reverse:5'- CTCAGAGCCGATGGTTGTCAT -3'      |
| <b>IL-6</b>                    | Forward:5'- CCAGTTGCCTTCTTGGGACT -3'       |
|                                | Reverse:5'- GGTCTGTTGGGAGTGGTATCC -3'      |
| <b>INF-<math>\gamma</math></b> | Forward:5'- GCATCTTGGCTTTGCAGCT -3'        |
|                                | Reverse: 5'- CCTTTTTTCGCCTTGCTGTTG -3'     |
| <b>TNF-<math>\alpha</math></b> | Forward:5'- GTTCTGTCTACTGAACTTCGGG -3'     |
|                                | Reverse:5'- GAGGCTTGTCACTCGAATTTTG -3'     |
| <b>IL-1<math>\beta</math></b>  | Forward:5'- ACGGACCCCAAAGATGAAG -3'        |
|                                | Reverse:5'- TTCTCCACAGCCACAATGAG -3'       |
